# Supplementary material for: Current-density pathways in figure-eight-shaped octaphyrins
Source: Royal Society of Chemistry journal article supplement (doi:10.1039/d3cp01062g), 2023-01-01
Supplement: d3cp01062g1.pdf [file d3cp01062g1.pdf]

# Journal Name

## ARTICLE TYPE

Cite this: DOI: 00.0000/xxxxxxxxxx

Electronic Supplementary Information

### **Current-density pathways in figure-eight-shaped octa- phyrins<sup>†</sup>**

Qian Wang<sup>a</sup>, Jaakko Pyykkö<sup>a</sup>, Maria Dimitrova<sup>a</sup>, Stefan Taubert<sup>a</sup> and Dage Sundholm,<sup>a‡</sup>

Received Date

Accepted Date

DOI: 00.0000/xxxxxxxxxx

<sup>a</sup> Department of Chemistry, Faculty of Science, P.O. Box 55 (A.I. Virtanens plats 1),  
FIN-00014 University of Helsinki, Finland, Dage.Sundholm@helsinki.fi

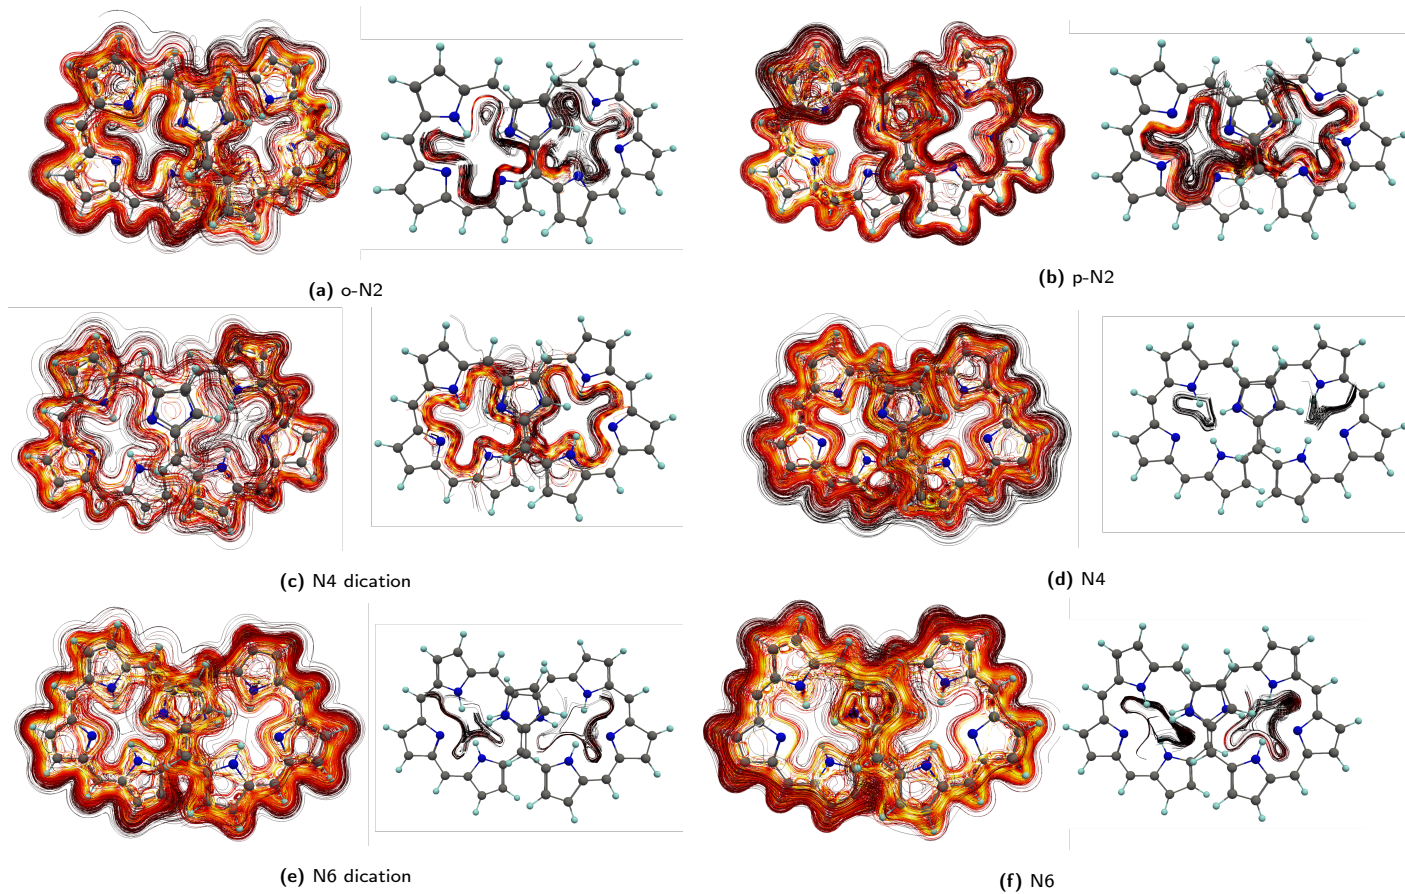

**Figure S 1** The separating diatropic current-density pathways (left) and the paratropic current-density pathways of the studied molecules.

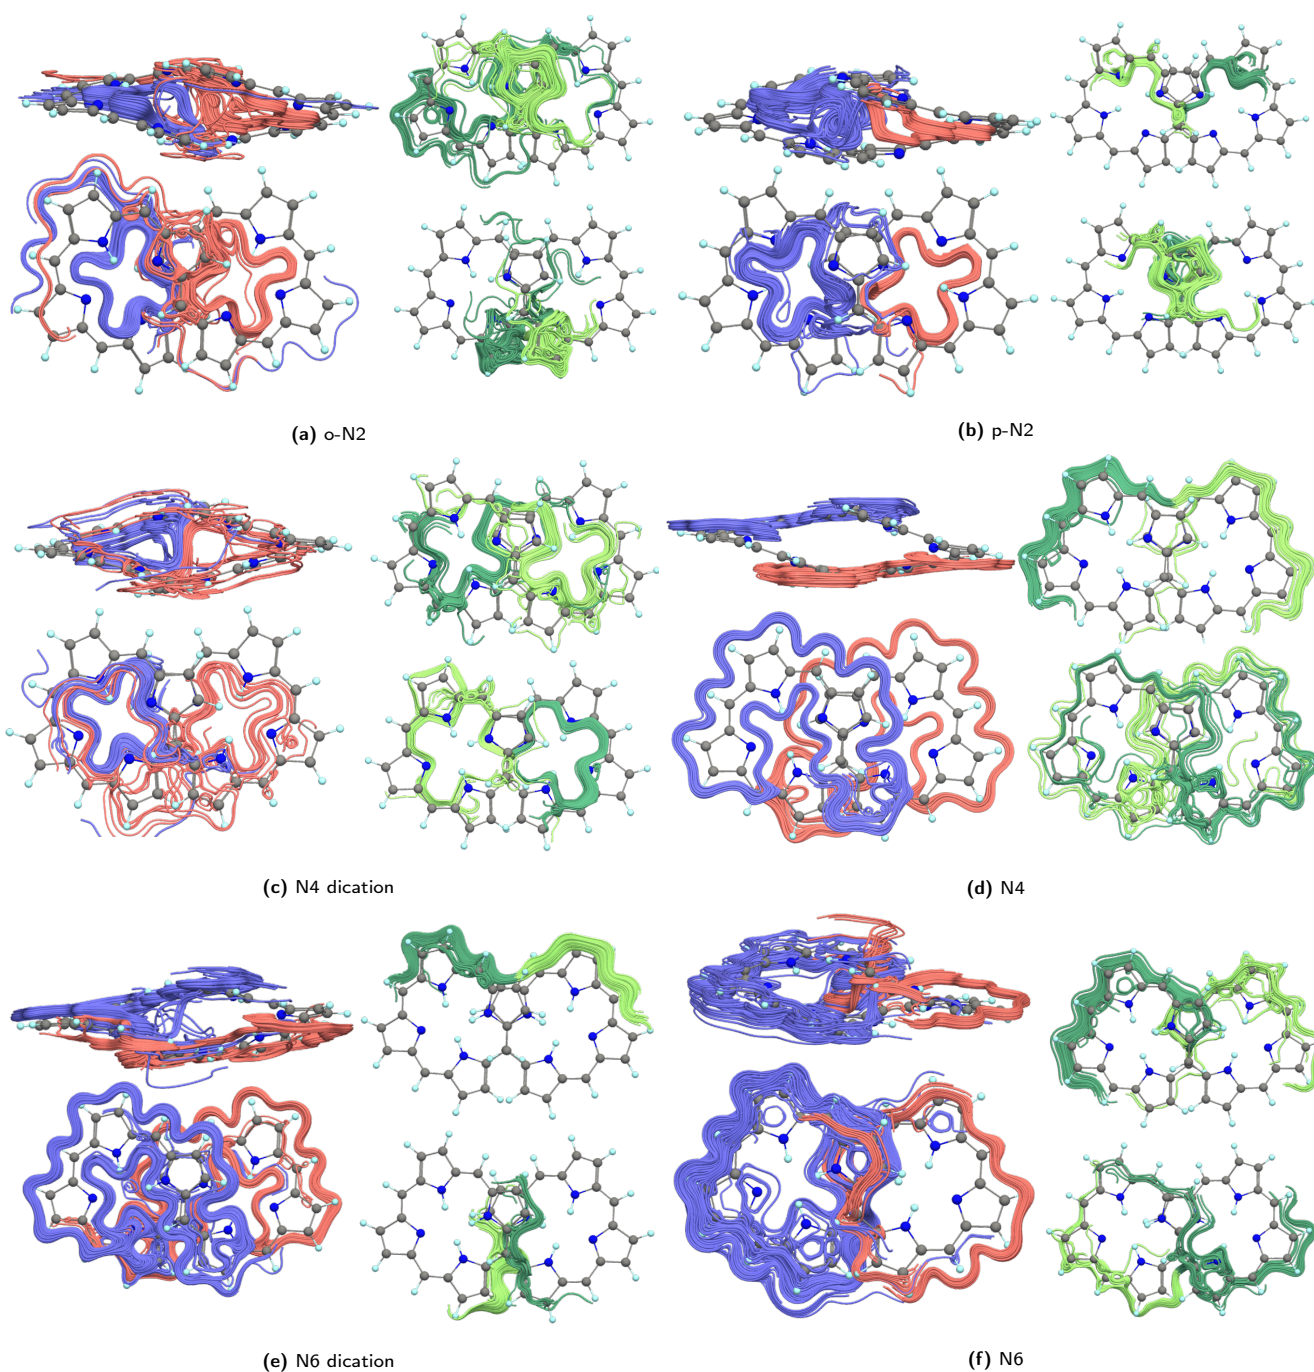

**Figure S 2** Current-density pathways (left) and vertical through-space current-density pathways (right) are shown. Current-density pathways in the two halves of the molecules are visualized in purple and orange, respectively. In the right pictures, the positions of the vertical through-space current-density pathways are shown. The direction of current-density flux is from dark green to the light green.

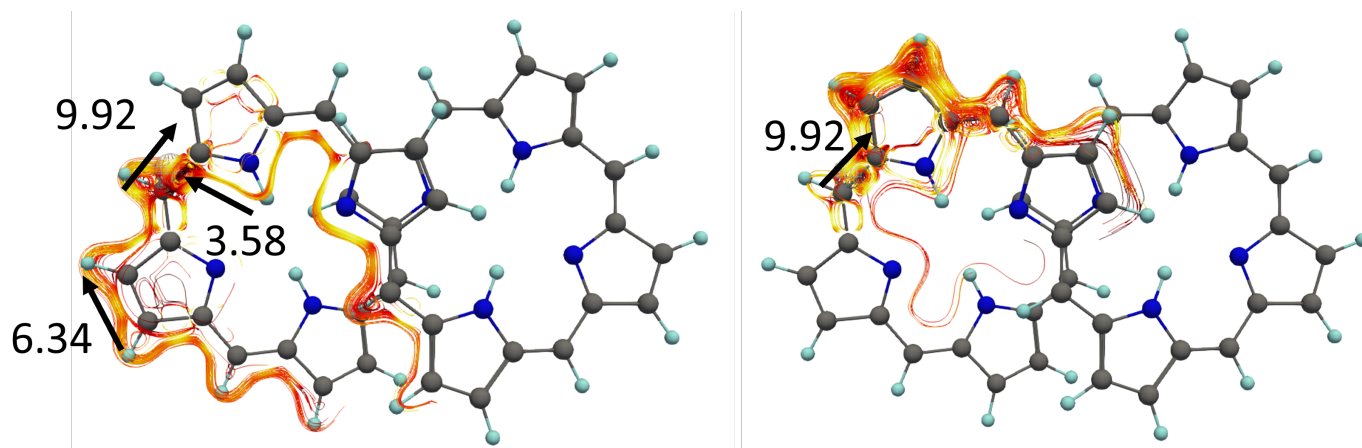

**Figure S 3** A junction of the current-density pathway is shown for N4. The left picture shows the current-density pathways arriving to the junction and the right picture shows the joined current-density pathway after the junction.

| Molecule    | positive (A) | negative (A) | positive (B) | negative (B) | bridge |
|-------------|--------------|--------------|--------------|--------------|--------|
| o-N2        | 4.08         | -2.42        | 7.04         | -2.38        | 2.96   |
| p-N2        | 2.41         | -6.32        | 5.46         | -6.29        | 3.05   |
| N4 Dication | 1.02         | -8.45        | 5.05         | -8.54        | 4.01   |
| N4          | 6.34         | 0            | 9.92         | 0            | 3.58   |
| N6 Dication | 4.83         | 0            | 10.81        | 0            | 5.93   |
| N6          | 8.33         | 0            | 13.22        | 0            | 4.89   |

**Table S 1** The positive and negative contributions to the current density (in nA/T) passing through plans A and B. bridge refers to the current density passing from the inside to the outside between the planes.

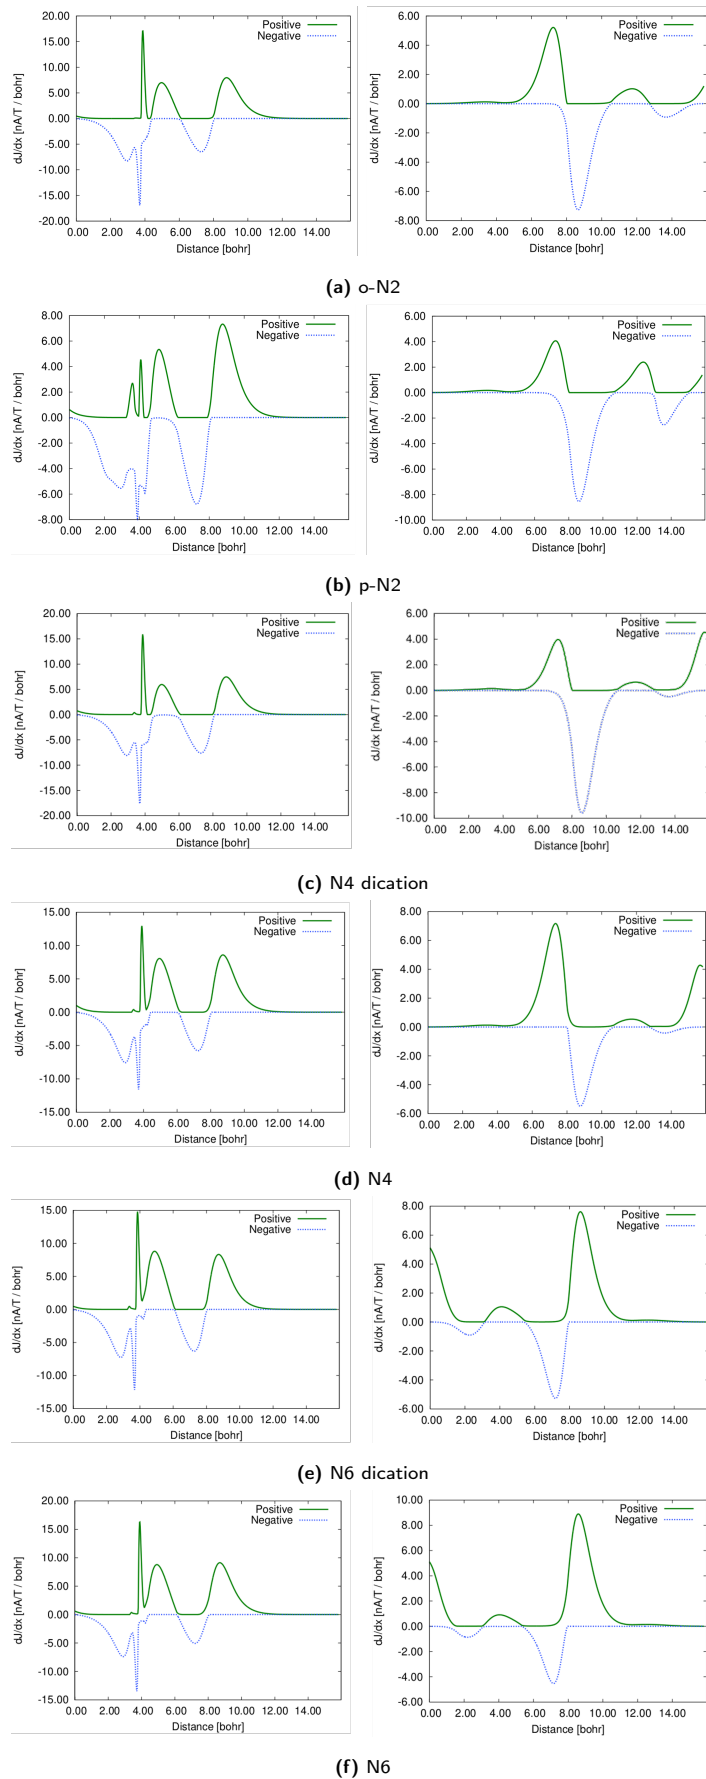

**Figure S 4** The current-density profiles along plane A (left) and along plane B (right). The planes begin inside the molecule.

#### Inner H in N4 molecule in calculation

|    |   |   |             |
|----|---|---|-------------|
| 73 | h | 2 | 20.66283906 |
| 74 | h | 2 | 22.02699667 |
| 75 | h | 0 | 20.66283906 |
| 76 | h | 0 | 22.02699667 |

#### $\beta$ -H in N4 molecule in calculation

|    |   |   |             |
|----|---|---|-------------|
| 71 | h | 0 | 24.86974805 |
| 72 | h | 0 | 24.48524293 |
| 57 | h | 2 | 24.70068266 |
| 58 | h | 2 | 24.42385092 |
| 63 | h | 2 | 24.86974805 |
| 64 | h | 2 | 24.48524293 |
| 65 | h | 0 | 24.70068266 |
| 66 | h | 0 | 24.42385092 |

#### Experimental $^1\text{H}$ NMR chemical shifts (in ppm) for the inner H of N4.

|       |             |                        |
|-------|-------------|------------------------|
| 13.25 | (s, 2H, NH) | corresponding to 18.75 |
| 8.59  | (s, 2H, NH) | corresponding to 23.41 |

#### Experimental $^1\text{H}$ NMR chemical shifts (in ppm) for $\beta$ -H of N4.

|      |                               |                        |
|------|-------------------------------|------------------------|
| 7.67 | (s, 2H, $\beta$ -H)           | corresponding to 24.33 |
| 6.48 | (d, J=5.0 Hz, 2H, $\beta$ -H) | corresponding to 25.52 |
| 6.26 | (d, J=5.0 Hz, 2H, $\beta$ -H) | corresponding to 25.74 |
| 6.22 | (s, 2H, $\beta$ -H)           | corresponding to 25.78 |
| 6.15 | (s, 2H, $\beta$ -H)           | corresponding to 25.85 |
| 6.22 | (s, 2H, $\beta$ -H)           | corresponding to 25.78 |
| 6.11 | (d, J=5.0 Hz, 6H, $\beta$ -H) | corresponding to 25.89 |

## 1 Cartesian coordinates of the molecular structures

### 1.1 o-N2

|   |            |            |            |
|---|------------|------------|------------|
| C | -6.2492537 | 0.0773707  | 1.0595731  |
| C | -5.3672090 | -0.2939894 | 2.0688949  |
| C | -5.6498589 | -0.4446004 | 3.4631852  |
| C | -4.4892219 | -0.8158563 | 4.0893562  |
| C | -3.4737740 | -0.9364600 | 3.0903389  |
| C | -2.1426145 | -1.3294220 | 3.2518929  |
| C | -1.2563946 | -1.5365589 | 2.2054707  |
| C | 0.1911164  | -1.7239540 | 2.2983873  |
| C | 0.6543617  | -1.7419291 | 1.0300461  |
| C | -0.5294135 | -1.6236906 | 0.1670198  |
| C | -0.6038664 | -1.6520426 | -1.2273676 |
| C | 0.4636091  | -1.5454191 | -2.1145838 |
| C | 0.3442017  | -1.6646790 | -3.5675087 |
| C | 1.5788392  | -1.4396325 | -4.0617563 |
| C | 2.4432704  | -1.1665577 | -2.9043387 |
| C | 3.8103746  | -0.9308963 | -3.0340890 |
| C | 4.8125748  | -0.6722355 | -2.0893801 |
| C | 6.2304437  | -0.7548088 | -2.4559668 |
| C | 6.9301972  | -0.5758573 | -1.3150977 |
| C | 5.9366779  | -0.3322594 | -0.2738758 |
| C | 6.2492537  | -0.0773707 | 1.0595731  |
| C | 5.3672090  | 0.2939894  | 2.0688949  |
| C | 5.6498589  | 0.4446004  | 3.4631852  |
| C | 4.4892219  | 0.8158563  | 4.0893562  |
| C | 3.4737740  | 0.9364600  | 3.0903389  |

|   |            |            |            |
|---|------------|------------|------------|
| C | 2.1426145  | 1.3294220  | 3.2518929  |
| C | 1.2563946  | 1.5365589  | 2.2054707  |
| C | -0.1911164 | 1.7239540  | 2.2983873  |
| C | -0.6543617 | 1.7419291  | 1.0300461  |
| C | 0.5294135  | 1.6236906  | 0.1670198  |
| C | 0.6038664  | 1.6520426  | -1.2273676 |
| C | -0.4636091 | 1.5454191  | -2.1145838 |
| C | -0.3442017 | 1.6646790  | -3.5675087 |
| C | -1.5788392 | 1.4396325  | -4.0617563 |
| C | -2.4432704 | 1.1665577  | -2.9043387 |
| C | -3.8103746 | 0.9308963  | -3.0340890 |
| C | -4.8125748 | 0.6722355  | -2.0893801 |
| C | -6.2304437 | 0.7548088  | -2.4559668 |
| C | -6.9301972 | 0.5758573  | -1.3150977 |
| C | -5.9366779 | 0.3322594  | -0.2738758 |
| H | -7.2879009 | 0.1730855  | 1.3505144  |
| H | -1.7881339 | -1.4531571 | 4.2670484  |
| H | -1.5997071 | -1.7317160 | -1.6432255 |
| H | 4.1797001  | -1.0185289 | -4.0506902 |
| H | 7.2879009  | -0.1730855 | 1.3505144  |
| H | 1.7881339  | 1.4531571  | 4.2670484  |
| H | 1.5997071  | 1.7317160  | -1.6432255 |
| H | -4.1797001 | 1.0185289  | -4.0506902 |
| N | -4.0463735 | -0.5974461 | 1.8978130  |
| N | -1.6486888 | -1.5100462 | 0.9050287  |
| N | 1.7341698  | -1.2362251 | -1.7549925 |
| N | 4.6749676  | -0.3935912 | -0.7747461 |
| N | 4.0463735  | 0.5974461  | 1.8978130  |
| N | 1.6486888  | 1.5100462  | 0.9050287  |
| N | -1.7341698 | 1.2362251  | -1.7549925 |
| N | -4.6749676 | 0.3935912  | -0.7747461 |
| H | -6.6147652 | -0.2727901 | 3.9118057  |
| H | -4.3402805 | -1.0115371 | 5.1387754  |
| H | 0.7608211  | -1.7859450 | 3.2126510  |
| H | 1.6658752  | -1.8154760 | 0.6695678  |
| H | -0.5653585 | -1.8842569 | -4.1037224 |
| H | 1.8981791  | -1.4473199 | -5.0929026 |
| H | 6.6078059  | -0.9579800 | -3.4465572 |
| H | 8.0001049  | -0.5879464 | -1.1745835 |
| H | 6.6147652  | 0.2727901  | 3.9118057  |
| H | 4.3402805  | 1.0115371  | 5.1387754  |
| H | -0.7608211 | 1.7859450  | 3.2126510  |
| H | -1.6658752 | 1.8154760  | 0.6695678  |
| H | 0.5653585  | 1.8842569  | -4.1037224 |
| H | -1.8981791 | 1.4473199  | -5.0929026 |
| H | -6.6078059 | 0.9579800  | -3.4465572 |
| H | -8.0001049 | 0.5879464  | -1.1745835 |
| H | -3.5469849 | -0.6122831 | 1.0080141  |
| H | 3.5469849  | 0.6122831  | 1.0080141  |

## 1.2 p-N2

|   |            |            |           |
|---|------------|------------|-----------|
| C | -6.1877097 | 0.9364397  | 1.3175023 |
| C | -5.2746055 | 0.4198513  | 2.2218628 |
| C | -5.5212019 | 0.1788981  | 3.6415727 |
| C | -4.3824294 | -0.3653515 | 4.1240013 |

|   |            |            |            |
|---|------------|------------|------------|
| C | -3.4654638 | -0.4834657 | 2.9842394  |
| C | -2.1926640 | -1.0690364 | 3.0810903  |
| C | -1.3284002 | -1.4043833 | 2.0534578  |
| C | 0.0901713  | -1.7360745 | 2.2422420  |
| C | 0.6270593  | -1.8268022 | 1.0102052  |
| C | -0.4928098 | -1.6256466 | 0.0758589  |
| C | -0.4887041 | -1.6532988 | -1.3220892 |
| C | 0.6074256  | -1.6222708 | -2.1714210 |
| C | 0.4894943  | -1.6782886 | -3.6268891 |
| C | 1.7465851  | -1.6028345 | -4.1128023 |
| C | 2.6238860  | -1.4863164 | -2.9452088 |
| C | 4.0179792  | -1.4529674 | -3.0338279 |
| C | 4.9654062  | -1.3615950 | -2.0243217 |
| C | 6.3628647  | -1.6269427 | -2.1988982 |
| C | 6.9655752  | -1.5465913 | -0.9777176 |
| C | 5.9695970  | -1.1772258 | -0.0196687 |
| C | 6.1877097  | -0.9364397 | 1.3175023  |
| C | 5.2746055  | -0.4198513 | 2.2218628  |
| C | 5.5212019  | -0.1788981 | 3.6415727  |
| C | 4.3824294  | 0.3653515  | 4.1240013  |
| C | 3.4654638  | 0.4834657  | 2.9842394  |
| C | 2.1926640  | 1.0690364  | 3.0810903  |
| C | 1.3284002  | 1.4043833  | 2.0534578  |
| C | -0.0901713 | 1.7360745  | 2.2422420  |
| C | -0.6270593 | 1.8268022  | 1.0102052  |
| C | 0.4928098  | 1.6256466  | 0.0758589  |
| C | 0.4887041  | 1.6532988  | -1.3220892 |
| C | -0.6074256 | 1.6222708  | -2.1714210 |
| C | -0.4894943 | 1.6782886  | -3.6268891 |
| C | -1.7465851 | 1.6028345  | -4.1128023 |
| C | -2.6238860 | 1.4863164  | -2.9452088 |
| C | -4.0179792 | 1.4529674  | -3.0338279 |
| C | -4.9654062 | 1.3615950  | -2.0243217 |
| C | -6.3628647 | 1.6269427  | -2.1988982 |
| C | -6.9655752 | 1.5465913  | -0.9777176 |
| C | -5.9695970 | 1.1772258  | -0.0196687 |
| H | -7.1873265 | 1.1487783  | 1.6750881  |
| H | -1.8362197 | -1.2566261 | 4.0881699  |
| H | -1.4685756 | -1.6332019 | -1.7828326 |
| H | 4.4327080  | -1.5807052 | -4.0264228 |
| H | 7.1873265  | -1.1487783 | 1.6750881  |
| H | 1.8362197  | 1.2566261  | 4.0881699  |
| H | 1.4685756  | 1.6332019  | -1.7828326 |
| H | -4.4327080 | 1.5807052  | -4.0264228 |
| N | -4.0227195 | 0.0226882  | 1.8705278  |
| N | -1.6416356 | -1.3910040 | 0.7304551  |
| N | 1.9132658  | -1.4886081 | -1.8004863 |
| N | 4.7781218  | -1.0824556 | -0.6932195 |
| N | 4.0227195  | -0.0226882 | 1.8705278  |
| N | 1.6416356  | 1.3910040  | 0.7304551  |
| N | -1.9132658 | 1.4886081  | -1.8004863 |
| N | -4.7781218 | 1.0824556  | -0.6932195 |
| H | -6.4348518 | 0.4014794  | 4.1709193  |
| H | -4.1733904 | -0.6914909 | 5.1314516  |
| H | 0.5957002  | -1.8163929 | 3.1921669  |
| H | 1.6498890  | -1.9957085 | 0.7245959  |



|   |            |            |            |
|---|------------|------------|------------|
| H | -0.4375882 | -1.7618983 | -4.1715468 |
| H | 2.0705183  | -1.6226341 | -5.1422286 |
| H | 6.8147304  | -1.8801888 | -3.1441492 |
| H | 8.0042844  | -1.7086318 | -0.7400667 |
| H | 6.4348518  | -0.4014794 | 4.1709193  |
| H | 4.1733904  | 0.6914909  | 5.1314516  |
| H | -0.5957002 | 1.8163929  | 3.1921669  |
| H | -1.6498890 | 1.9957085  | 0.7245959  |
| H | 0.4375882  | 1.7618983  | -4.1715468 |
| H | -2.0705183 | 1.6226341  | -5.1422286 |
| H | -6.8147304 | 1.8801888  | -3.1441492 |
| H | -8.0042844 | 1.7086318  | -0.7400667 |
| H | -3.9108909 | 0.7783281  | -0.2708635 |
| H | 3.9108909  | -0.7783281 | -0.2708635 |

### 1.3 N4 dication

|   |            |            |            |
|---|------------|------------|------------|
| C | -5.8916400 | -0.3551126 | 1.3170185  |
| C | -4.8750822 | -0.6046113 | 2.2237250  |
| C | -5.0294883 | -0.7033417 | 3.6495552  |
| C | -3.8121455 | -1.0012312 | 4.1837141  |
| C | -2.8791785 | -1.1241307 | 3.1004204  |
| C | -1.5366240 | -1.4823281 | 3.1834359  |
| C | -0.6836130 | -1.6626071 | 2.1027439  |
| C | 0.7514228  | -1.9301795 | 2.1842429  |
| C | 1.2072174  | -1.9362079 | 0.9142923  |
| C | 0.0320068  | -1.7226699 | 0.0602473  |
| C | -0.0459646 | -1.7194090 | -1.3334540 |
| C | 0.9824401  | -1.5063351 | -2.2344558 |
| C | 0.9058442  | -1.6381218 | -3.6599944 |
| C | 2.1198512  | -1.3022717 | -4.1851289 |
| C | 2.9748513  | -0.9251364 | -3.0987120 |
| C | 4.3041931  | -0.5174758 | -3.1588651 |
| C | 5.1109564  | -0.1783281 | -2.0784365 |
| C | 6.5578505  | 0.0023663  | -2.1816957 |
| C | 7.0015981  | 0.1738486  | -0.9220979 |
| C | 5.8139341  | 0.1618063  | -0.0654333 |
| C | 5.8916400  | 0.3551126  | 1.3170185  |
| C | 4.8750822  | 0.6046113  | 2.2237250  |
| C | 5.0294883  | 0.7033417  | 3.6495552  |
| C | 3.8121455  | 1.0012312  | 4.1837141  |
| C | 2.8791785  | 1.1241307  | 3.1004204  |
| C | 1.5366240  | 1.4823281  | 3.1834359  |
| C | 0.6836130  | 1.6626071  | 2.1027439  |
| C | -0.7514228 | 1.9301795  | 2.1842429  |
| C | -1.2072174 | 1.9362079  | 0.9142923  |
| C | -0.0320068 | 1.7226699  | 0.0602473  |
| C | 0.0459646  | 1.7194090  | -1.3334540 |
| C | -0.9824401 | 1.5063351  | -2.2344558 |
| C | -0.9058442 | 1.6381218  | -3.6599944 |
| C | -2.1198512 | 1.3022717  | -4.1851289 |
| C | -2.9748513 | 0.9251364  | -3.0987120 |
| C | -4.3041931 | 0.5174758  | -3.1588651 |
| C | -5.1109564 | 0.1783281  | -2.0784365 |
| C | -6.5578505 | -0.0023663 | -2.1816957 |
| C | -7.0015981 | -0.1738486 | -0.9220979 |

|   |            |            |            |
|---|------------|------------|------------|
| C | -5.8139341 | -0.1618063 | -0.0654333 |
| H | -6.8871634 | -0.3332755 | 1.7424875  |
| H | -1.1370033 | -1.6266263 | 4.1785092  |
| H | -1.0330435 | -1.8544216 | -1.7577969 |
| H | 4.7607247  | -0.5166114 | -4.1399411 |
| H | 6.8871634  | 0.3332755  | 1.7424875  |
| H | 1.1370033  | 1.6266263  | 4.1785092  |
| H | 1.0330435  | 1.8544216  | -1.7577969 |
| H | -4.7607247 | 0.5166114  | -4.1399411 |
| N | -3.5572017 | -0.8528588 | 1.9457972  |
| N | -1.0810753 | -1.5689610 | 0.8067114  |
| N | 2.2528088  | -1.0646761 | -1.9488235 |
| N | 4.6868727  | -0.0541661 | -0.7862378 |
| N | 3.5572017  | 0.8528588  | 1.9457972  |
| N | 1.0810753  | 1.5689610  | 0.8067114  |
| N | -2.2528088 | 1.0646761  | -1.9488235 |
| N | -4.6868727 | 0.0541661  | -0.7862378 |
| H | -5.9611157 | -0.5547438 | 4.1709605  |
| H | -3.5661056 | -1.1491183 | 5.2225519  |
| H | 1.3091864  | -2.0995859 | 3.0917552  |
| H | 2.2111995  | -2.1485776 | 0.5850758  |
| H | 0.0310114  | -1.9784733 | -4.1895017 |
| H | 2.4187035  | -1.3175762 | -5.2206414 |
| H | 7.1291878  | -0.0372762 | -3.0955103 |
| H | 8.0146276  | 0.3191004  | -0.5817103 |
| H | 5.9611157  | 0.5547438  | 4.1709605  |
| H | 3.5661056  | 1.1491183  | 5.2225519  |
| H | -1.3091864 | 2.0995859  | 3.0917552  |
| H | -2.2111995 | 2.1485776  | 0.5850758  |
| H | -0.0310114 | 1.9784733  | -4.1895017 |
| H | -2.4187035 | 1.3175762  | -5.2206414 |
| H | -7.1291878 | 0.0372762  | -3.0955103 |
| H | -8.0146276 | -0.3191004 | -0.5817103 |
| H | -3.1299183 | -0.9386977 | 1.0287695  |
| H | 2.6409292  | -0.7891244 | -1.0535675 |
| H | 3.1299183  | 0.9386977  | 1.0287695  |
| H | -2.6409292 | 0.7891244  | -1.0535675 |

#### 1.4 N4

|   |            |            |            |
|---|------------|------------|------------|
| C | -5.8735076 | -0.4062874 | 1.3532440  |
| C | -4.8228843 | -0.6099469 | 2.2713406  |
| C | -4.9436167 | -0.6696498 | 3.6787284  |
| C | -3.6905949 | -0.9376901 | 4.2021828  |
| C | -2.7939416 | -1.0676633 | 3.1199568  |
| C | -1.4238372 | -1.3946919 | 3.1683450  |
| C | -0.5944738 | -1.5844688 | 2.0950230  |
| C | 0.8365212  | -1.8313557 | 2.1473215  |
| C | 1.2690809  | -1.8522153 | 0.8661681  |
| C | 0.0813109  | -1.6518661 | 0.0311765  |
| C | 0.0052035  | -1.6317393 | -1.3861288 |
| C | 1.0216555  | -1.3772485 | -2.2620729 |
| C | 0.9401192  | -1.4372809 | -3.7052131 |
| C | 2.1398853  | -1.0772983 | -4.2220874 |
| C | 3.0253813  | -0.7539965 | -3.1259044 |
| C | 4.3295854  | -0.3384115 | -3.1767002 |

|   |            |            |            |
|---|------------|------------|------------|
| C | 5.1407344  | -0.0596070 | -2.0478300 |
| C | 6.5899064  | 0.0871826  | -2.1202581 |
| C | 7.0201192  | 0.2270457  | -0.8460853 |
| C | 5.8314288  | 0.2213968  | -0.0063341 |
| C | 5.8735076  | 0.4062874  | 1.3532440  |
| C | 4.8228843  | 0.6099469  | 2.2713406  |
| C | 4.9436167  | 0.6696498  | 3.6787284  |
| C | 3.6905949  | 0.9376901  | 4.2021828  |
| C | 2.7939416  | 1.0676633  | 3.1199568  |
| C | 1.4238372  | 1.3946919  | 3.1683450  |
| C | 0.5944738  | 1.5844688  | 2.0950230  |
| C | -0.8365212 | 1.8313557  | 2.1473215  |
| C | -1.2690809 | 1.8522153  | 0.8661681  |
| C | -0.0813109 | 1.6518661  | 0.0311765  |
| C | -0.0052035 | 1.6317393  | -1.3861288 |
| C | -1.0216555 | 1.3772485  | -2.2620729 |
| C | -0.9401192 | 1.4372809  | -3.7052131 |
| C | -2.1398853 | 1.0772983  | -4.2220874 |
| C | -3.0253813 | 0.7539965  | -3.1259044 |
| C | -4.3295854 | 0.3384115  | -3.1767002 |
| C | -5.1407344 | 0.0596070  | -2.0478300 |
| C | -6.5899064 | -0.0871826 | -2.1202581 |
| C | -7.0201192 | -0.2270457 | -0.8460853 |
| C | -5.8314288 | -0.2213968 | -0.0063341 |
| H | -6.8614966 | -0.4283149 | 1.7976760  |
| H | -0.9962382 | -1.4889186 | 4.1588169  |
| H | -0.9780453 | -1.7801365 | -1.8129378 |
| H | 4.7893780  | -0.2691149 | -4.1531602 |
| H | 6.8614966  | 0.4283149  | 1.7976760  |
| H | 0.9962382  | 1.4889186  | 4.1588169  |
| H | 0.9780453  | 1.7801365  | -1.8129378 |
| H | -4.7893780 | 0.2691149  | -4.1531602 |
| N | -3.5085728 | -0.8438507 | 1.9723391  |
| N | -1.0120575 | -1.5072975 | 0.7778668  |
| N | 2.3074265  | -0.9654758 | -1.9740631 |
| N | 4.7024092  | 0.0367928  | -0.7829782 |
| N | 3.5085728  | 0.8438507  | 1.9723391  |
| N | 1.0120575  | 1.5072975  | 0.7778668  |
| N | -2.3074265 | 0.9654758  | -1.9740631 |
| N | -4.7024092 | -0.0367928 | -0.7829782 |
| H | -5.8640539 | -0.5220131 | 4.2196070  |
| H | -3.4222950 | -1.0526521 | 5.2397074  |
| H | 1.4229714  | -1.9471452 | 3.0452620  |
| H | 2.2762631  | -2.0219348 | 0.5223599  |
| H | 0.0533228  | -1.7378579 | -4.2386025 |
| H | 2.4246024  | -1.0326810 | -5.2610682 |
| H | 7.1771130  | 0.0557947  | -3.0251272 |
| H | 8.0318483  | 0.3498891  | -0.4911207 |
| H | 5.8640539  | 0.5220131  | 4.2196070  |
| H | 3.4222950  | 1.0526521  | 5.2397074  |
| H | -1.4229714 | 1.9471452  | 3.0452620  |
| H | -2.2762631 | 2.0219348  | 0.5223599  |
| H | -0.0533228 | 1.7378579  | -4.2386025 |
| H | -2.4246024 | 1.0326810  | -5.2610682 |
| H | -7.1771130 | -0.0557947 | -3.0251272 |
| H | -8.0318483 | -0.3498891 | -0.4911207 |

|   |            |            |            |
|---|------------|------------|------------|
| H | -3.0942106 | -0.9210060 | 1.0487077  |
| H | 2.6849387  | -0.6835655 | -1.0781505 |
| H | 3.0942106  | 0.9210060  | 1.0487077  |
| H | -2.6849387 | 0.6835655  | -1.0781505 |

### 1.5 N6 dication

|   |            |            |            |
|---|------------|------------|------------|
| C | -6.1085111 | 0.3237713  | -1.5722461 |
| C | -4.9927416 | 0.6343272  | -2.3787385 |
| C | -4.9704655 | 0.8495149  | -3.7765429 |
| C | -3.6786748 | 1.1676792  | -4.1271937 |
| C | -2.8823802 | 1.1728860  | -2.9502513 |
| C | -1.5264377 | 1.4913802  | -2.9190972 |
| C | -0.6251419 | 1.6335156  | -1.8811670 |
| C | 0.7793881  | 1.8102742  | -2.0132726 |
| C | 1.3437842  | 1.8029373  | -0.7610899 |
| C | 0.2967800  | 1.6508582  | 0.1919362  |
| C | 0.3066044  | 1.5785742  | 1.5952916  |
| C | 1.3901334  | 1.2970009  | 2.3936723  |
| C | 1.3915558  | 1.2680461  | 3.8409476  |
| C | 2.6284534  | 0.9106321  | 4.2636341  |
| C | 3.4521508  | 0.6807350  | 3.0998526  |
| C | 4.7683779  | 0.3262928  | 3.0389056  |
| C | 5.5207973  | 0.1310748  | 1.8497854  |
| C | 6.9804432  | 0.0950500  | 1.8480674  |
| C | 7.3548555  | -0.0055587 | 0.5576162  |
| C | 6.1265756  | -0.0960273 | -0.2216910 |
| C | 6.1085111  | -0.3237713 | -1.5722461 |
| C | 4.9927416  | -0.6343272 | -2.3787385 |
| C | 4.9704655  | -0.8495149 | -3.7765429 |
| C | 3.6786748  | -1.1676792 | -4.1271937 |
| C | 2.8823802  | -1.1728860 | -2.9502513 |
| C | 1.5264377  | -1.4913802 | -2.9190972 |
| C | 0.6251419  | -1.6335156 | -1.8811670 |
| C | -0.7793881 | -1.8102742 | -2.0132726 |
| C | -1.3437842 | -1.8029373 | -0.7610899 |
| C | -0.2967800 | -1.6508582 | 0.1919362  |
| C | -0.3066044 | -1.5785742 | 1.5952916  |
| C | -1.3901334 | -1.2970009 | 2.3936723  |
| C | -1.3915558 | -1.2680461 | 3.8409476  |
| C | -2.6284534 | -0.9106321 | 4.2636341  |
| C | -3.4521508 | -0.6807350 | 3.0998526  |
| C | -4.7683779 | -0.3262928 | 3.0389056  |
| C | -5.5207973 | -0.1310748 | 1.8497854  |
| C | -6.9804432 | -0.0950500 | 1.8480674  |
| C | -7.3548555 | 0.0055587  | 0.5576162  |
| C | -6.1265756 | 0.0960273  | -0.2216910 |
| H | -7.0614424 | 0.3152639  | -2.0851318 |
| H | -1.0953819 | 1.6507453  | -3.8997672 |
| H | -0.6361209 | 1.7119199  | 2.1101757  |
| H | 5.2988488  | 0.2387435  | 3.9772677  |
| H | 7.0614424  | -0.3152639 | -2.0851318 |
| H | 1.0953819  | -1.6507453 | -3.8997672 |
| H | 0.6361209  | -1.7119199 | 2.1101757  |
| H | -5.2988488 | -0.2387435 | 3.9772677  |
| N | -3.7260283 | 0.8344472  | -1.9082654 |

|   |            |            |            |
|---|------------|------------|------------|
| N | -0.8686919 | 1.5568138  | -0.5184126 |
| H | -1.7740700 | 1.5431542  | -0.0821033 |
| N | 2.6500707  | 0.9253040  | 2.0019098  |
| N | 5.0167040  | 0.0087921  | 0.6107907  |
| N | 3.7260283  | -0.8344472 | -1.9082654 |
| N | 0.8686919  | -1.5568138 | -0.5184126 |
| H | 1.7740700  | -1.5431542 | -0.0821033 |
| N | -2.6500707 | -0.9253040 | 2.0019098  |
| N | -5.0167040 | -0.0087921 | 0.6107907  |
| H | -5.8282484 | 0.7759986  | -4.4243635 |
| H | -3.3082605 | 1.4047892  | -5.1114500 |
| H | 1.2893500  | 1.9257369  | -2.9557651 |
| H | 2.3834914  | 1.9640296  | -0.5331422 |
| H | 0.5361391  | 1.5207862  | 4.4458878  |
| H | 2.9748618  | 0.8099917  | 5.2795864  |
| H | 7.6061903  | 0.1649081  | 2.7236144  |
| H | 8.3527118  | -0.0500725 | 0.1507492  |
| H | 5.8282484  | -0.7759986 | -4.4243635 |
| H | 3.3082605  | -1.4047892 | -5.1114500 |
| H | -1.2893500 | -1.9257369 | -2.9557651 |
| H | -2.3834914 | -1.9640296 | -0.5331422 |
| H | -0.5361391 | -1.5207862 | 4.4458878  |
| H | -2.9748618 | -0.8099917 | 5.2795864  |
| H | -7.6061903 | -0.1649081 | 2.7236144  |
| H | -8.3527118 | 0.0500725  | 0.1507492  |
| H | -3.5272480 | 0.6822841  | -0.9299010 |
| H | 3.0281221  | 0.8399496  | 1.0699018  |
| H | 3.5272480  | -0.6822841 | -0.9299010 |
| H | -3.0281221 | -0.8399496 | 1.0699018  |

## 1.6 N6

|   |            |            |            |
|---|------------|------------|------------|
| C | -5.9778624 | 0.2352256  | -1.5839407 |
| C | -4.9060737 | 0.5501665  | -2.3999314 |
| C | -4.9016959 | 0.7763863  | -3.8075977 |
| C | -3.6333798 | 1.1300899  | -4.1804137 |
| C | -2.8005132 | 1.1500491  | -3.0188501 |
| C | -1.4591234 | 1.4946187  | -2.9982281 |
| C | -0.5829273 | 1.6188506  | -1.9227520 |
| C | 0.8282513  | 1.7720065  | -1.9875085 |
| C | 1.3358820  | 1.7538435  | -0.7110039 |
| C | 0.2505828  | 1.6134357  | 0.1998293  |
| C | 0.1994767  | 1.5067862  | 1.5826312  |
| C | 1.2678774  | 1.2501475  | 2.4369324  |
| C | 1.2478015  | 1.2073829  | 3.8599692  |
| C | 2.5002686  | 0.8420408  | 4.3008031  |
| C | 3.3248763  | 0.6363152  | 3.1620377  |
| C | 4.6659805  | 0.2890321  | 3.0737747  |
| C | 5.3948810  | 0.0958008  | 1.9008052  |
| C | 6.8397065  | 0.0090198  | 1.8820703  |
| C | 7.2065501  | -0.0504241 | 0.5780764  |
| C | 5.9808924  | -0.0638420 | -0.1951463 |
| C | 5.9778624  | -0.2352256 | -1.5839407 |
| C | 4.9060737  | -0.5501665 | -2.3999314 |
| C | 4.9016959  | -0.7763863 | -3.8075977 |
| C | 3.6333798  | -1.1300899 | -4.1804137 |

|   |            |            |            |
|---|------------|------------|------------|
| C | 2.8005132  | -1.1500491 | -3.0188501 |
| C | 1.4591234  | -1.4946187 | -2.9982281 |
| C | 0.5829273  | -1.6188506 | -1.9227520 |
| C | -0.8282513 | -1.7720065 | -1.9875085 |
| C | -1.3358820 | -1.7538435 | -0.7110039 |
| C | -0.2505828 | -1.6134357 | 0.1998293  |
| C | -0.1994767 | -1.5067862 | 1.5826312  |
| C | -1.2678774 | -1.2501475 | 2.4369324  |
| C | -1.2478015 | -1.2073829 | 3.8599692  |
| C | -2.5002686 | -0.8420408 | 4.3008031  |
| C | -3.3248763 | -0.6363152 | 3.1620377  |
| C | -4.6659805 | -0.2890321 | 3.0737747  |
| C | -5.3948810 | -0.0958008 | 1.9008052  |
| C | -6.8397065 | -0.0090198 | 1.8820703  |
| C | -7.2065501 | 0.0504241  | 0.5780764  |
| C | -5.9808924 | 0.0638420  | -0.1951463 |
| H | -6.9403346 | 0.1820955  | -2.0765790 |
| H | -1.0154791 | 1.6653983  | -3.9698633 |
| H | -0.7707593 | 1.5791469  | 2.0574227  |
| H | 5.2078206  | 0.2100702  | 4.0071663  |
| H | 6.9403346  | -0.1820955 | -2.0765790 |
| H | 1.0154791  | -1.6653983 | -3.9698633 |
| H | 0.7707593  | -1.5791469 | 2.0574227  |
| H | -5.2078206 | -0.2100702 | 4.0071663  |
| N | -3.6175107 | 0.7792410  | -1.9661072 |
| N | -0.8900682 | 1.5559464  | -0.5834570 |
| H | -1.8142007 | 1.5147120  | -0.1939311 |
| N | 2.5396768  | 0.8946209  | 2.0609498  |
| N | 4.8926173  | 0.0376627  | 0.6231381  |
| N | 3.6175107  | -0.7792410 | -1.9661072 |
| N | 0.8900682  | -1.5559464 | -0.5834570 |
| H | 1.8142007  | -1.5147120 | -0.1939311 |
| N | -2.5396768 | -0.8946209 | 2.0609498  |
| N | -4.8926173 | -0.0376627 | 0.6231381  |
| H | -5.7710176 | 0.6877995  | -4.4386388 |
| H | -3.2870526 | 1.3871496  | -5.1685315 |
| H | 1.3868154  | 1.8516459  | -2.9053450 |
| H | 2.3719914  | 1.8722638  | -0.4439281 |
| H | 0.3806881  | 1.4366179  | 4.4565190  |
| H | 2.8270877  | 0.7258984  | 5.3214334  |
| H | 7.4740301  | 0.0241558  | 2.7549323  |
| H | 8.2021261  | -0.1118475 | 0.1659298  |
| H | 5.7710176  | -0.6877995 | -4.4386388 |
| H | 3.2870526  | -1.3871496 | -5.1685315 |
| H | -1.3868154 | -1.8516459 | -2.9053450 |
| H | -2.3719914 | -1.8722638 | -0.4439281 |
| H | -0.3806881 | -1.4366179 | 4.4565190  |
| H | -2.8270877 | -0.7258984 | 5.3214334  |
| H | -7.4740301 | -0.0241558 | 2.7549323  |
| H | -8.2021261 | 0.1118475  | 0.1659298  |
| H | -3.3784794 | 0.5870512  | -1.0060937 |
| H | 2.9240759  | 0.7824813  | 1.1334261  |
| H | 3.3784794  | -0.5870512 | -1.0060937 |
| H | -2.9240759 | -0.7824813 | 1.1334261  |

## 2 The $^1\text{H}$ NMR shielding constants

### 2.1 o-N2

| No. | Type | Mult. | Isotropic   |
|-----|------|-------|-------------|
| 41  | h    | 2     | 25.47441227 |
| 42  | h    | 2     | 26.55029397 |
| 43  | h    | 2     | 26.43402158 |
| 44  | h    | 2     | 25.69537934 |
| 45  | h    | 0     | 25.47441227 |
| 46  | h    | 0     | 26.55029397 |
| 47  | h    | 0     | 26.43402158 |
| 48  | h    | 0     | 25.69537934 |
| 57  | h    | 2     | 25.04395804 |
| 58  | h    | 2     | 25.37196745 |
| 59  | h    | 2     | 26.64445592 |
| 60  | h    | 2     | 23.42778384 |
| 61  | h    | 2     | 26.56485761 |
| 62  | h    | 2     | 25.81436554 |
| 63  | h    | 2     | 24.71860343 |
| 64  | h    | 2     | 24.76117397 |
| 65  | h    | 0     | 25.04395804 |
| 66  | h    | 0     | 25.37196745 |
| 67  | h    | 0     | 26.64445592 |
| 68  | h    | 0     | 23.42778384 |
| 69  | h    | 0     | 26.56485761 |
| 70  | h    | 0     | 25.81436554 |
| 71  | h    | 0     | 24.71860343 |
| 72  | h    | 0     | 24.76117397 |
| 73  | h    | 2     | 18.35469394 |
| 74  | h    | 0     | 18.35469394 |

### 2.2 p-N2

| No. | Type | Mult. | Isotropic   |
|-----|------|-------|-------------|
| 41  | h    | 2     | 26.30801970 |
| 42  | h    | 2     | 27.00457550 |
| 43  | h    | 2     | 24.85952826 |
| 44  | h    | 2     | 26.85164480 |
| 45  | h    | 0     | 26.30801970 |
| 46  | h    | 0     | 27.00457550 |
| 47  | h    | 0     | 24.85952826 |
| 48  | h    | 0     | 26.85164480 |
| 57  | h    | 2     | 25.21377991 |
| 58  | h    | 2     | 25.21220187 |
| 59  | h    | 2     | 26.69413283 |
| 60  | h    | 2     | 22.47712630 |
| 61  | h    | 2     | 26.86175542 |
| 62  | h    | 2     | 26.31955288 |
| 63  | h    | 2     | 25.57328834 |
| 64  | h    | 2     | 25.52037107 |
| 65  | h    | 0     | 25.21377991 |
| 66  | h    | 0     | 25.21220187 |
| 67  | h    | 0     | 26.69413283 |
| 68  | h    | 0     | 22.47712630 |
| 69  | h    | 0     | 26.86175542 |
| 70  | h    | 0     | 26.31955288 |
| 71  | h    | 0     | 25.57328834 |

|    |   |   |             |
|----|---|---|-------------|
| 72 | h | 0 | 25.52037107 |
| 73 | h | 2 | 16.91756658 |
| 74 | h | 0 | 16.91756658 |

### 2.3 N4 dication

| No. | Type | Mult. | Isotropic   |
|-----|------|-------|-------------|
| 41  | h    | 2     | 26.05143974 |
| 42  | h    | 2     | 27.70822468 |
| 43  | h    | 2     | 24.09046828 |
| 44  | h    | 2     | 26.49113619 |
| 45  | h    | 0     | 26.05143974 |
| 46  | h    | 0     | 27.70822468 |
| 47  | h    | 0     | 24.09046828 |
| 48  | h    | 0     | 26.49113619 |
| 57  | h    | 2     | 25.26663414 |
| 58  | h    | 2     | 25.67390470 |
| 59  | h    | 2     | 25.41567451 |
| 60  | h    | 2     | 22.56075522 |
| 61  | h    | 2     | 26.50316411 |
| 62  | h    | 2     | 25.93360889 |
| 63  | h    | 2     | 25.02219475 |
| 64  | h    | 2     | 24.96624470 |
| 65  | h    | 0     | 25.26663414 |
| 66  | h    | 0     | 25.67390470 |
| 67  | h    | 0     | 25.41567451 |
| 68  | h    | 0     | 22.56075522 |
| 69  | h    | 0     | 26.50316411 |
| 70  | h    | 0     | 25.93360889 |
| 71  | h    | 0     | 25.02219475 |
| 72  | h    | 0     | 24.96624470 |
| 73  | h    | 2     | 15.53895912 |
| 74  | h    | 2     | 16.66548751 |
| 75  | h    | 0     | 15.53895912 |
| 76  | h    | 0     | 16.66548751 |

### 2.4 N4

| No. | Type | Mult. | Isotropic   |
|-----|------|-------|-------------|
| 41  | h    | 2     | 24.73301392 |
| 42  | h    | 2     | 24.65763128 |
| 43  | h    | 2     | 25.26251872 |
| 44  | h    | 2     | 25.10992536 |
| 45  | h    | 0     | 24.73301392 |
| 46  | h    | 0     | 24.65763128 |
| 47  | h    | 0     | 25.26251872 |
| 48  | h    | 0     | 25.10992536 |
| 57  | h    | 2     | 24.70068266 |
| 58  | h    | 2     | 24.42385092 |
| 59  | h    | 2     | 24.24320356 |
| 60  | h    | 2     | 25.13627886 |
| 61  | h    | 2     | 24.43826854 |
| 62  | h    | 2     | 24.66328601 |
| 63  | h    | 2     | 24.86974805 |
| 64  | h    | 2     | 24.48524293 |
| 65  | h    | 0     | 24.70068266 |
| 66  | h    | 0     | 24.42385092 |



|    |   |   |             |
|----|---|---|-------------|
| 67 | h | 0 | 24.24320356 |
| 68 | h | 0 | 25.13627886 |
| 69 | h | 0 | 24.43826854 |
| 70 | h | 0 | 24.66328601 |
| 71 | h | 0 | 24.86974805 |
| 72 | h | 0 | 24.48524293 |
| 73 | h | 2 | 20.66283906 |
| 74 | h | 2 | 22.02699667 |
| 75 | h | 0 | 20.66283906 |
| 76 | h | 0 | 22.02699667 |

## 2.5 N6 dication

| No. | Type | Mult. | Isotropic   |
|-----|------|-------|-------------|
| 41  | h    | 2     | 24.16318862 |
| 42  | h    | 2     | 23.63369685 |
| 43  | h    | 2     | 24.90612936 |
| 44  | h    | 2     | 23.84560411 |
| 45  | h    | 0     | 24.16318862 |
| 46  | h    | 0     | 23.63369685 |
| 47  | h    | 0     | 24.90612936 |
| 48  | h    | 0     | 23.84560411 |
| 51  | h    | 2     | 24.43321552 |
| 56  | h    | 0     | 24.43321552 |
| 59  | h    | 2     | 24.03050822 |
| 60  | h    | 2     | 23.49561000 |
| 61  | h    | 2     | 23.06270032 |
| 62  | h    | 2     | 24.90738797 |
| 63  | h    | 2     | 23.36751044 |
| 64  | h    | 2     | 23.43484604 |
| 65  | h    | 2     | 24.42752480 |
| 66  | h    | 2     | 23.96220400 |
| 67  | h    | 0     | 24.03050822 |
| 68  | h    | 0     | 23.49561000 |
| 69  | h    | 0     | 23.06270032 |
| 70  | h    | 0     | 24.90738797 |
| 71  | h    | 0     | 23.36751044 |
| 72  | h    | 0     | 23.43484604 |
| 73  | h    | 0     | 24.42752480 |
| 74  | h    | 0     | 23.96220400 |
| 75  | h    | 2     | 22.22166240 |
| 76  | h    | 2     | 22.72581872 |
| 77  | h    | 0     | 22.22166240 |
| 78  | h    | 0     | 22.72581872 |

## 2.6 N6

| No. | Type | Mult. | Isotropic   |
|-----|------|-------|-------------|
| 41  | h    | 2     | 24.22975150 |
| 42  | h    | 2     | 25.10890771 |
| 43  | h    | 2     | 31.35824941 |
| 44  | h    | 2     | 24.41128773 |
| 45  | h    | 0     | 24.22975150 |
| 46  | h    | 0     | 25.10890771 |
| 47  | h    | 0     | 31.35824941 |
| 48  | h    | 0     | 24.41128773 |
| 51  | h    | 2     | 31.60576025 |

|    |   |   |             |
|----|---|---|-------------|
| 56 | h | 0 | 31.60576025 |
| 59 | h | 2 | 24.01712102 |
| 60 | h | 2 | 24.30882599 |
| 61 | h | 2 | 27.35002672 |
| 62 | h | 2 | 27.39164894 |
| 63 | h | 2 | 25.18082398 |
| 64 | h | 2 | 24.06037921 |
| 65 | h | 2 | 23.85368080 |
| 66 | h | 2 | 23.77515427 |
| 67 | h | 0 | 24.01712102 |
| 68 | h | 0 | 24.30882599 |
| 69 | h | 0 | 27.35002672 |
| 70 | h | 0 | 27.39164894 |
| 71 | h | 0 | 25.18082398 |
| 72 | h | 0 | 24.06037921 |
| 73 | h | 0 | 23.85368080 |
| 74 | h | 0 | 23.77515427 |
| 75 | h | 2 | 27.74463424 |
| 76 | h | 2 | 25.05355948 |
| 77 | h | 0 | 27.74463424 |
| 78 | h | 0 | 25.05355948 |
